# Supplementary material for: Cholesterol esterification inhibition and imatinib treatment synergistically inhibit growth of BCR-ABL mutation-independent resistant chronic myelogenous leukemia
Source: PLoS One. 2017 Jul 18;12(7):e0179558. doi: 10.1371/journal.pone.0179558 (PMC5515395; doi:10.1371/journal.pone.0179558)
Supplement: S1 Table — (XLSX) [file pone.0179558.s008.xlsx]

## Sheet: Sheet1
S1 Table.
For Figure 4A, 4E-F
Intracellular	Antigen Target (Human)	Elemental isotope	Clone	Dilution	Surface	Antigen Target (Human)	Elemental isotope	Clone	Dilution
	Caspase 3 (cleaved)	142Nd	D3E9	1x		CD45	89Y	HI30	0.1x
	pCRKL	143Nd	Polyclonal	1x		CD235ab	141Pr	HIR2	0.33x
	cPARP/PE*	145Nd	F21-852/PE001	1x		CD15	144Nd	W6D3	0.5x
	pSTAT5	150Nd	47	1x		CD61	146Nd	VI-PL2	0.5x
	pAKT	152Sm	D9E	1x		CD45RA	147Sm	HI100	1x (2.3ug/ml)
	pSTAT1	153Eu	58D6	1x		CD34	148Nd	581	1x
	pp38	156Gd	D3F9	1x		CD66a	149Sm	CD66a-B1.1	1x
	pSTAT3	158Gd	4/P - stat3	1x		CD123 (IL-3R)	151Eu	6H6	0.33x
	pPLCg2	162Dy	K86-689.37	1x		CD90	159Tb	50000000000	1x
	IkBa	164Dy	L35A5	1x		CD14	160Gd	M5E2	0.5x
	NFkB	166Er	K10-895.12.50	0.1x		CD19	165Ho	HIB19	0.25x
	Ki-67	168Er	B56	1x		CD38	167Er	HIT2	0.5x
	pS6	172Yb	N7-548	1x		CD3	170Er	UCHT1	0.33x
	pCREB	176Yb	87G3	1x		CD33	173Yb	WM53	1x
						HLA-DR	174Yb	L243	0.33x
		*PARP PE staining was performed as secondary staining				CD71	175Lu	OKT-9	0.33x
						CD16	209Bi	3G8	1x
For Figure 4B-D
	Antigen Target (Human)	Elemental isotope	Clone	Dilution		Antigen Target (Human)	Elemental isotope	Clone	Dilution
	pSHP2	141Pr	D66F10	1x		CD45	89Y	HI30	0.1x
	Caspase 3 Cleaved	142Nd	D3E9	1x		CD117 (c-kit)	143Nd	104D2	1x
	p4E-BP1	149Sm	236B4	0.5x		CD15 (SSEA-1)	144Nd	W6D3	0.5x
	pStat5 [Y694]	150Nd	47	1x		CD16	145Nd	3G8	1x
	pAkt [S473]	152Sm	D9E	1x		CD61	146Nd
	pStat1 [Y701]	153Eu	58D6	1x		CD45RA	147Sm	HI100	0.54x (1.25 ug/ml)
	pBTK/ITK	154Sm	24a/BTK	0.5x(1.3ug/ml)		CD34	148Nd	581	1x
	pBad(S112)	155Gd	40A9	1.8x (4.9ug/ml)		CD123 (IL-3R)	151Eu	6H6	0.33x
	p38 [T180/Y182]	156Gd	D3F9	1x		CD14	160Gd	M5E2	1x
	pStat3	158Gd	4/P-Stat3	1x		CD90	161Dy	50000000000	1x
	pMAPKAP2	159Tb	27B7	0.5x		CD66b	162Dy	80H3	0.1x
	IkBa	164Dy	L35A5	1x		CD235ab	163Dy	HIR2	0.5x
	pNF-kB p65 [S529]	166Er	K10-895.12.50	0.1x		CD19	165Ho	HIB19	0.25x
	Ki67	168Er	Ki67	1x		CD38	167Er	HIT2	0.5x
	pTBK1/NAK (S172)	169Tm	D52C2	2.3x (5 ug/ml)		CD3	170Er	UCHT1	0.33x
	pERK1	171Yb	D13.14.4E	2x		CD33	173Yb	P67.6	1x
	pS6 [S235/S236]	172Yb	N7-548	0.33x		HLA-DR	174Yb	L243	0.33X
	pCREB	176Yb	87G3	0.33x		CD71	175Lu	OKT-9	0.33x
						CD47	209Bi	CC2C6	2x
